# Supplementary material for: Cryptic and ubiquitous aplastidic cryptophytes are key freshwater flagellated bacterivores
Source: PubMed Central journal article supplement (PMC9751141; doi:10.1038/s41396-022-01326-4), 2022-10-07
Supplement: 41396_2022_1326_MOESM1_ESM.pdf [file 41396_2022_1326_MOESM1_ESM.pdf]

## Supplementary Information

### Cryptic and ubiquitous aplastidic cryptophytes are key freshwater flagellated bacterivores

Karel Šimek, Indranil Mukherjee, Tiberiu Szöke-Nagy, Markus Haber, Michaela M. Salcher, Rohit Ghai

---

**Supplementary Figure S1.** Lake Biwa: (a) One year seasonal course of Chl-*a* concentrations and total abundance of bacteria and HNF, of absolute (b) and relative proportions (c) of aplastidic cryptophytes targeted by probe CryptoB and by probe Cry1-652 (targeting its Cry1 lineage) in total HNF.

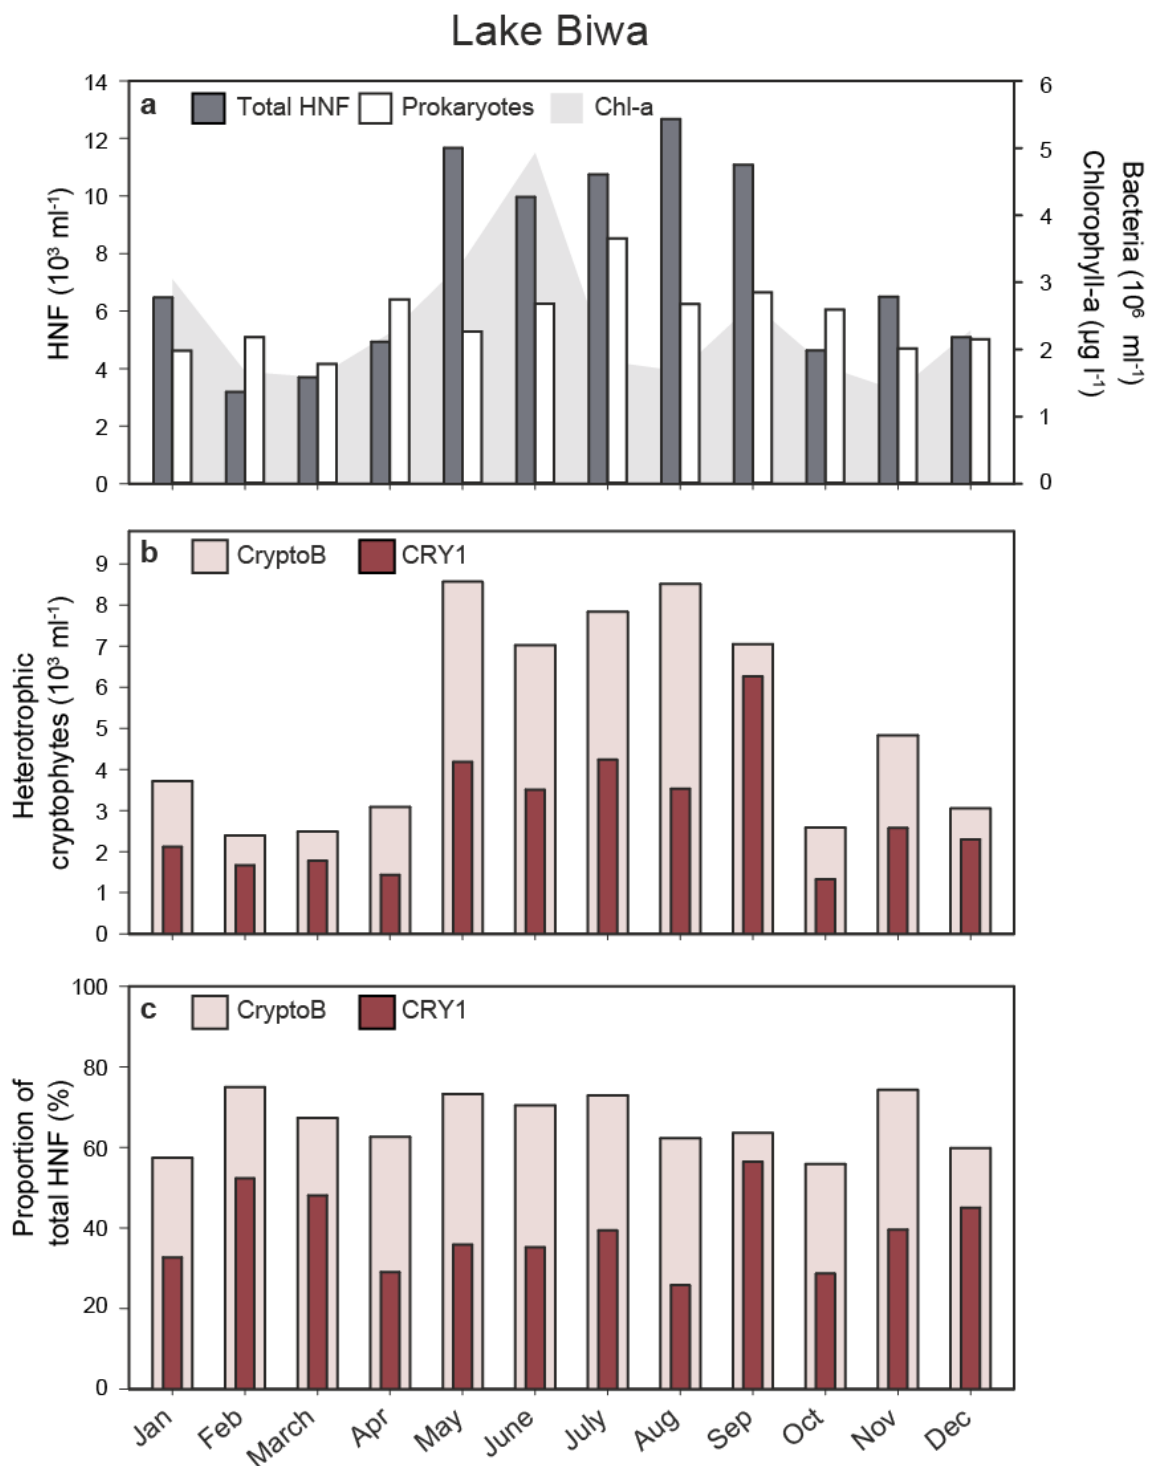

**Supplementary Figure S2:** (a-f) 18S rRNA abundances (expressed as percentage of total eukaryotic reads) of CRY1 and non-CRY1 cryptophytes across metagenomes from diverse freshwater habitats. The site names are indicated at top left for each. Wherever known the sampling depths are indicated. Legend is at bottom right.

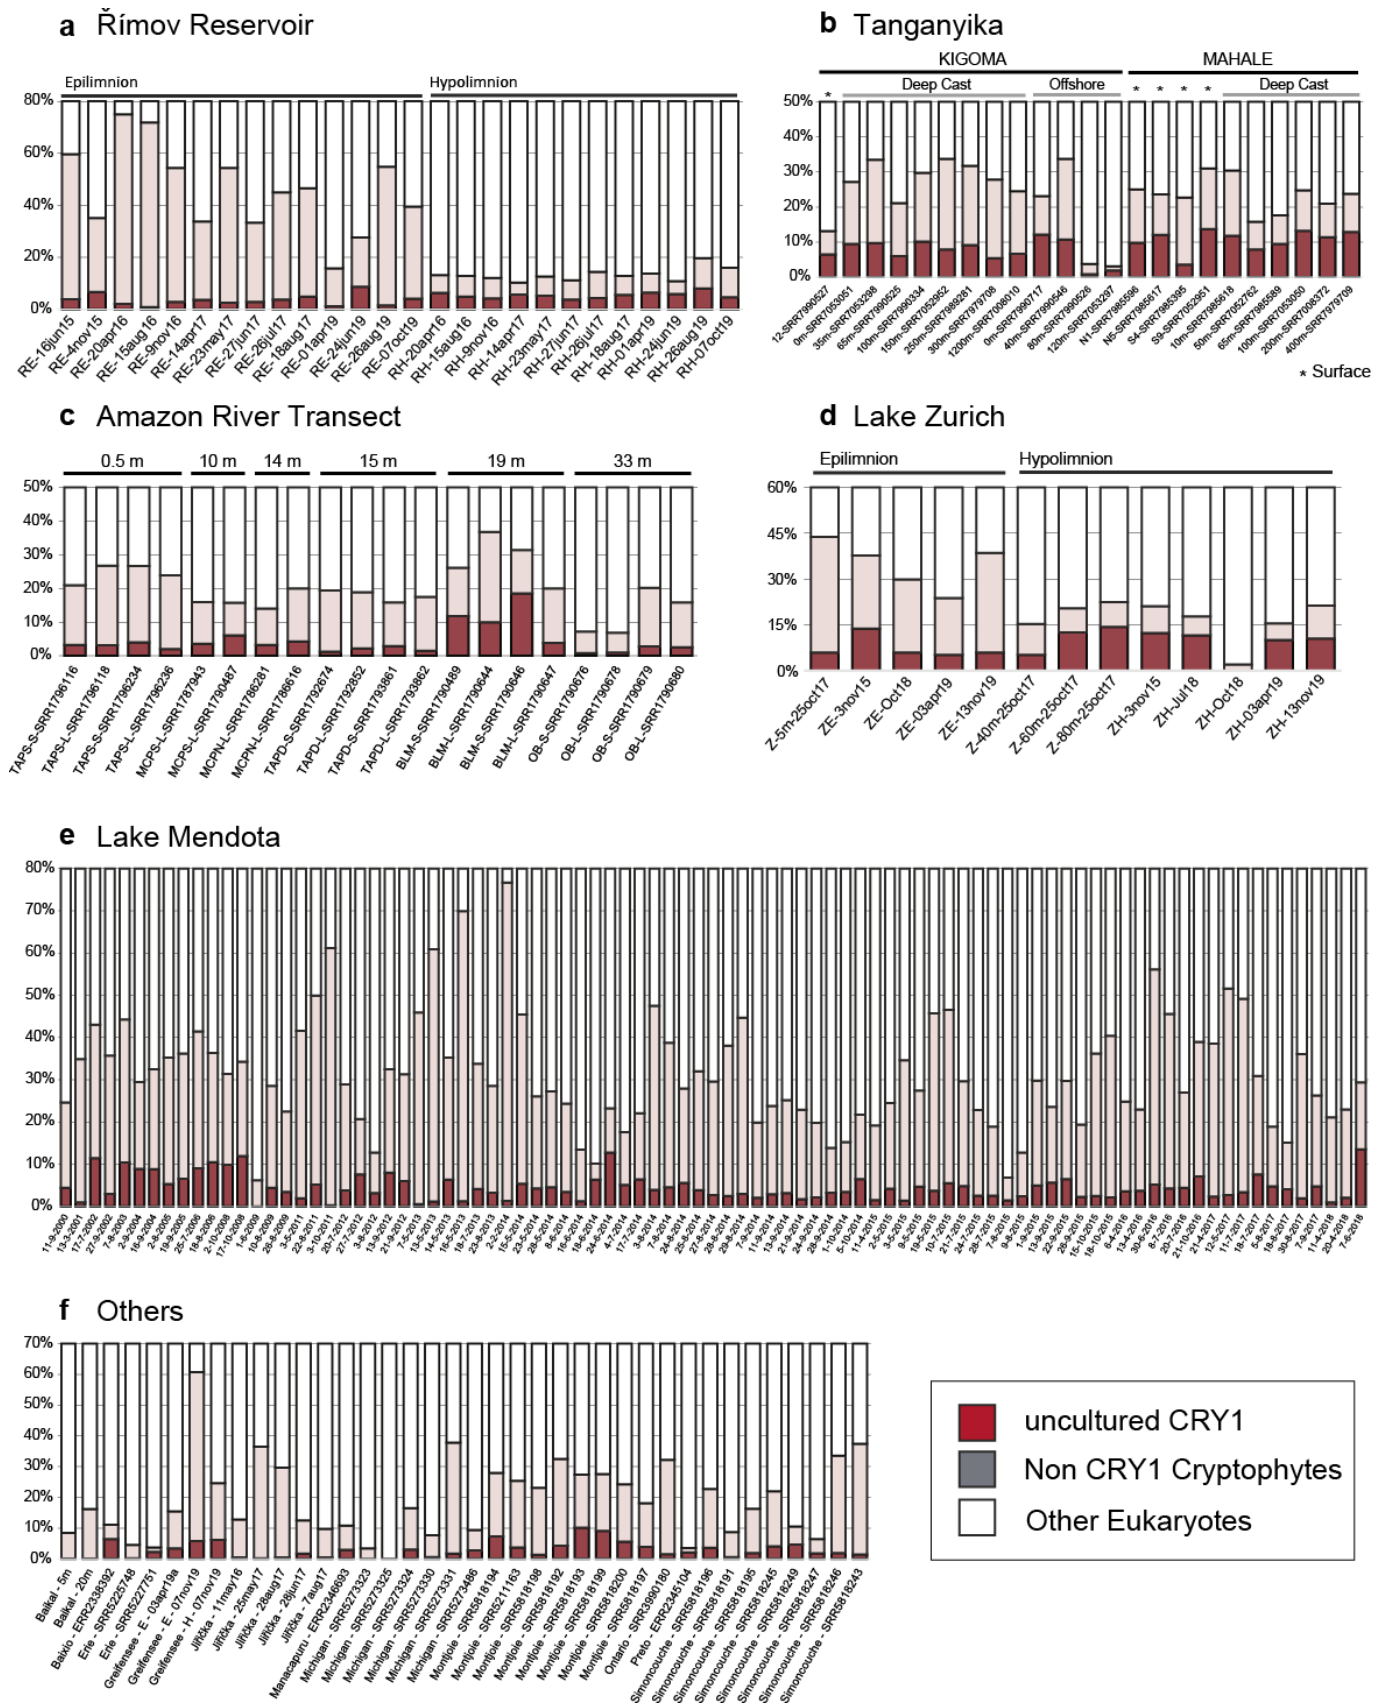

**Supplementary Tables can be found as separate file (All\_Supplementary\_Tables - Simek.xlsx)**

**Supplementary Table S1.** Characteristics (country of origin, date and depth of sampling) and a total number of samples analyzed from the epilimnion of 24 lakes and the metalimnion of 14 deep lakes. Hypolimnetic samples were mostly taken ca. 10 m above the bottom of the lake.

**Supplementary Table S2.** Abundances, mean cell volumes and numerical and biovolume ratios of aplastidic to plastidic cryptophytes from the epilimnion of four oligo-mesotrophic lakes with a simultaneous occurrence of both aplastidic (see examples in Fig. **1a–h**) and chloroplast-bearing (*Rhodomonas* and *Cryptomonas* spp.; Fig. **1i–l**) cryptophytes. Cryptophytes were targeted by probes CryptoB and Cry1-652. The percentage of CRY1 to total aplastidic cryptophytes is given in parentheses.

**Supplementary Table S3.** Spearman's rank correlation coefficients of determination ( $R^2$ ) of the data from the epilimnion of 24 lakes shown in Fig. **2a–c**. % - relative proportions of probe-defined groups of cryptophytes; abund. – abundances of bacteria, total HNF and flagellates targeted by probes Cry1-652 and CryptoB. Significant positive correlation are in black bold, significant negative correlation in red bold; \*  $p < 0.05$ , \*\*  $p < 0.01$ , \*\*\*  $p < 0.001$ .

**Supplementary Table S4.** Spearman's rank correlation coefficients of determination ( $R^2$ ) of the data from the hypolimnion of 14 lakes shown in Fig. **2d–f**. % - relative proportions of probe-defined groups of cryptophytes.; abund. – abundances of bacteria, total HNF and flagellates targeted by probes Cry1-652 and CryptoB. Significant positive correlation are in bold; \*  $p < 0.05$ , \*\*  $p < 0.01$ , \*\*\*  $p < 0.001$ .

**Supplementary Table S5.** Metagenomic datasets and sampling details for the analyzed metagenomes. "N / A" stands for not available.

**Supplementary Table S6.** Number of 18S rRNA reads recovered from freshwater metagenomic datasets. 20 million reads were sampled from each dataset, only those that had >500 eukaryotic 18s rRNA hits are shown here. (\*) Entire dataset was scanned for 18s rRNA sequences to identify Cryptophytes.

**Supplementary Table S7.** Number of 18S rRNA reads recovered from metagenomic datasets which also have CARD-FISH data.
